# Supplementary material
Source: PubMed Central journal article supplement (PMC7008078)
Supplement: NIHMS1542102-supplement-1.pdf [file NIHMS1542102-supplement-1.pdf]

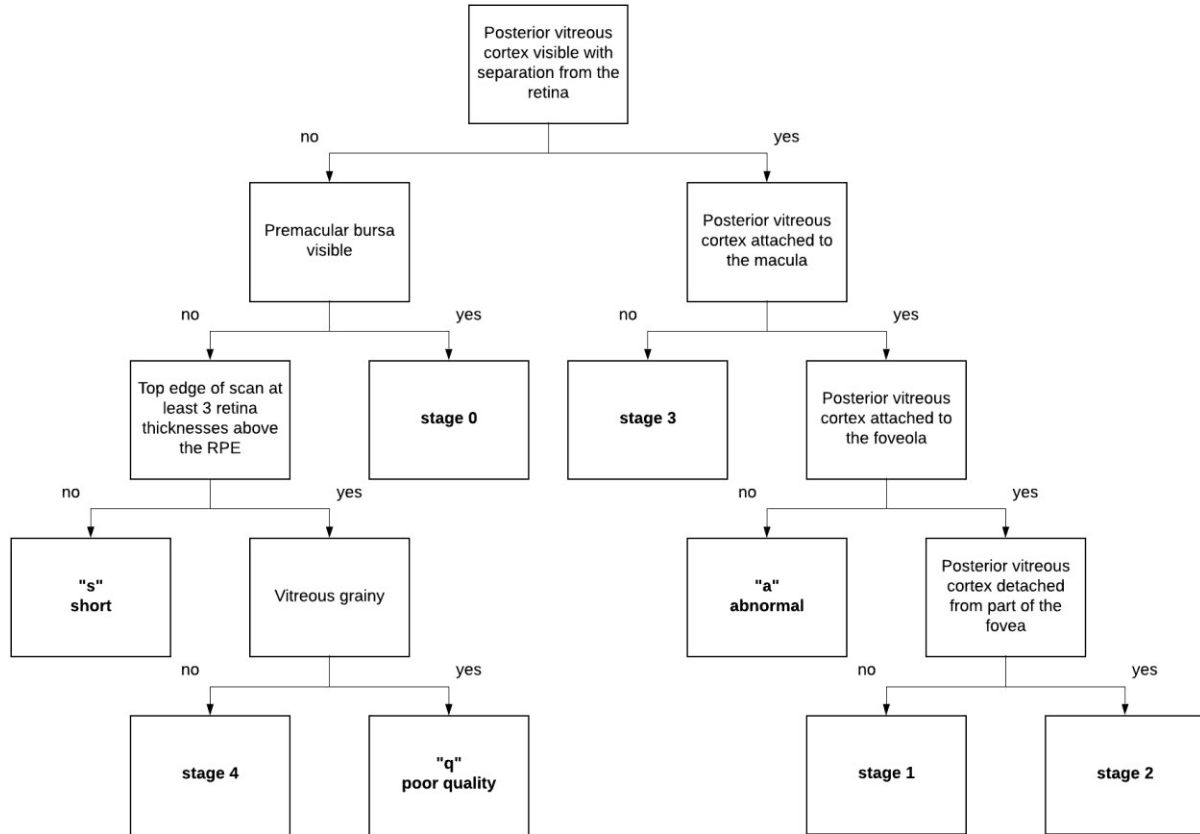

**SUPPLEMENTAL FIGURE 1.** Decision tree used to grade posterior vitreous detachment stage on optical coherence tomography of the macula. Each condition of the decision tree was considered met if the critical feature was seen in at least one of the 12 scans. RPE = retinal pigment epithelium.
